# Supplementary material for: Differential expression of two microRNAs, miR-29a-3p and miR-15b-5p, in SARS-CoV-2 infection in the immunocompromised and immunocompetent host
Source: Research Square preprint supplement (doi:10.21203/rs.3.rs-8027804/v1), 2025-12-30
Supplement: Supplementary file 1 [file 403570b49b012d1f1cda3f3d.docx]

**Supplementary table 1**

|  |  |  |  |  |  |  |  |
| --- | --- | --- | --- | --- | --- | --- | --- |
|  |  |  |  |  |  |  |  |
| **Immunocompromised patients (numeric code)** | **age** | **Covid 19 stadiation** | **Immunodepression condition** | **Time of observation** | **ct N gene** | **Time from first observation and start of symptoms (in daus)** | **COVID 19 therapy** |
| 1 | 75 | Moderate | chronic lymphocytic leukemia in followup | March 2023 | 34 | 90 | sotrovimab (one day) plus remdesivir for 10 days and nirmatrelvir/ritonavir for 5 days |
| 2 | 62 | Paucisymptomatic | multiple myeloma undergoing CART therapy | January 2023 | 32 | 30 | sotrovimab (one day) and remdesivir for 3 days |
| 3 | 64 | Severe | chronic lymphocytic leukemia in followup | March 2023 | 28 | 15 | sotrovimab (one day) and remdesivir for 10 days |
| 4 | 62 | Severe | unspecified neutropenia | March 2023 | 23 | 30 | nirmatrelvir/ritonavir and remdesivir for 20 days for two therapeutic cycles and sotrovimab (one day) |
| 5 | 67 | Severe | idiopathic thrombocytopenia and hypoglobulinemia | May 2023 | 22 | 15 | Sotrovimab (one day) plus remdesivir and nirmatrelvir/ritonavir for 10 days |
| 6 | 67 | Paucisymptomatic | heart transplant recipient undergoing immunosuppressive therapy | December 2023 | 26 | 15 | sotrovimab (one day) and remdesivir for 10 days |
| 7 | 70 | Paucisymptomatic | chronic lymphocytic leukemia in followup | November 2023 | 28 | 60 | sotrovimab (one day) and remdesivir for 10 days |
|  |  |  |  |  |  |  |  |

**Supplementary table 2**

|  |  |  |  |  |
| --- | --- | --- | --- | --- |
| **Non immunocompromised patients**  **(numeric code)** | **age** | **Covid 19 stadiation** | **ct N gene** | **Time of observation** |
| 8 | 73 | paucisymptomatic | 34 | March 2023 |
| 9 | 58 | paucisymptomatic | 34 | January 2023 |
| 10 | 68 | paucisymptomatic | 26 | March 2023 |
| 11 | 68 | paucisymptomatic | 23 | March 2023 |
| 12 | 62 | paucisymptomatic | 24 | May 2023 |
| 13 | 69 | paucisymptomatic | 26 | December 2023 |
| 14 | 70 | paucisymptomatic | 25 | November 2023 |
|  |  |  |  |  |
