# Supplementary material for: Differential expression of two microRNAs, miR-29a-3p and miR-15b-5p, in SARS-CoV-2 infection in the immunocompromised and immunocompetent host
Source: Research Square preprint supplement (doi:10.21203/rs.3.rs-8027804/v1), 2025-12-30
Supplement: Supplementary file 2 [file ce3ad867656e885c8abdf00a.docx]

|  | **Immunocompromised**  **SARS- CoV-2 Positive Patients** | **Non Immunocompromised**  **SARS- CoV-2 Positive Patients** |
| --- | --- | --- |
| **Patients** | 7 | 7 |
| **Median age, years (range)** | 67 (62-75) | 68 (58-73) |
| **Male, N (%)** | 4 (57.1) | 4 (57.1) |
| **Immunodepression condition N (%):**  **- *Hematologic patients**  **- Transplant recipients** | 6 (85,4)  1 (14,3) | NA |
| **Covid-19 stadiation, N (%):**  **- Paucisymptomatic**  **- Moderate**  **- Severe** | 3 (4.8)  1 (14.3)  3 (42.8) | 7 (100)  0  0 |
| **Sars Cov 2 Therapy:**  **Triple therapy with nirmatrelvir/ritonavir plus remdesivir plus sotrovimab**  **Double therapy with remdesivir sotrovimab** | 3 (43)  4 (57) | 0  0 |
| **Outcome N (%):**  **-Recovery**  **-Exitus** | 6 (85,7)  1 (14,3) | 7 (100)  0 |

**Table 1:** **Clinical ed epidemiological characteristics of Sars COV 2 enrolled patients**
